# Supplementary material for: Tenability and improvement of the structural, electronic, and optical properties of lead-free CsSnCl3perovskite by incorporating reduced graphene oxide (rGO) for optoelectronic applications
Source: Royal Society of Chemistry journal article supplement (doi:10.1039/d2tc04586a), 2023-01-01
Supplement: d2tc04586a1.pdf [file d2tc04586a1.pdf]

## Supplementary Information

### **Tenability and improvement of structural, electronic, and optical properties of lead-free CsSnCl<sub>3</sub> perovskite by incorporating reduced graphene oxide (rGO) for optoelectronic application**

*Ajay Kumar, Nivedita Pandey, Deepak Punetha, Saha Rajib, Subhananda Chakrabarti\**

*Department of Electrical Engineering, Indian Institute of Technology Bombay, India-400076*

*Email: [ajay106kumar@gmail.com](mailto:ajay106kumar@gmail.com), [niveditapandey.iitb@gmail.com](mailto:niveditapandey.iitb@gmail.com), [er.punetha@gmail.com](mailto:er.punetha@gmail.com), [saharajib836@gmail.com](mailto:saharajib836@gmail.com) &*

*Corresponding author: [\\*subho@ee.iitb.ac.in](mailto:*subho@ee.iitb.ac.in)*

This file included the following information:

Figures S1 to S2

Table S1

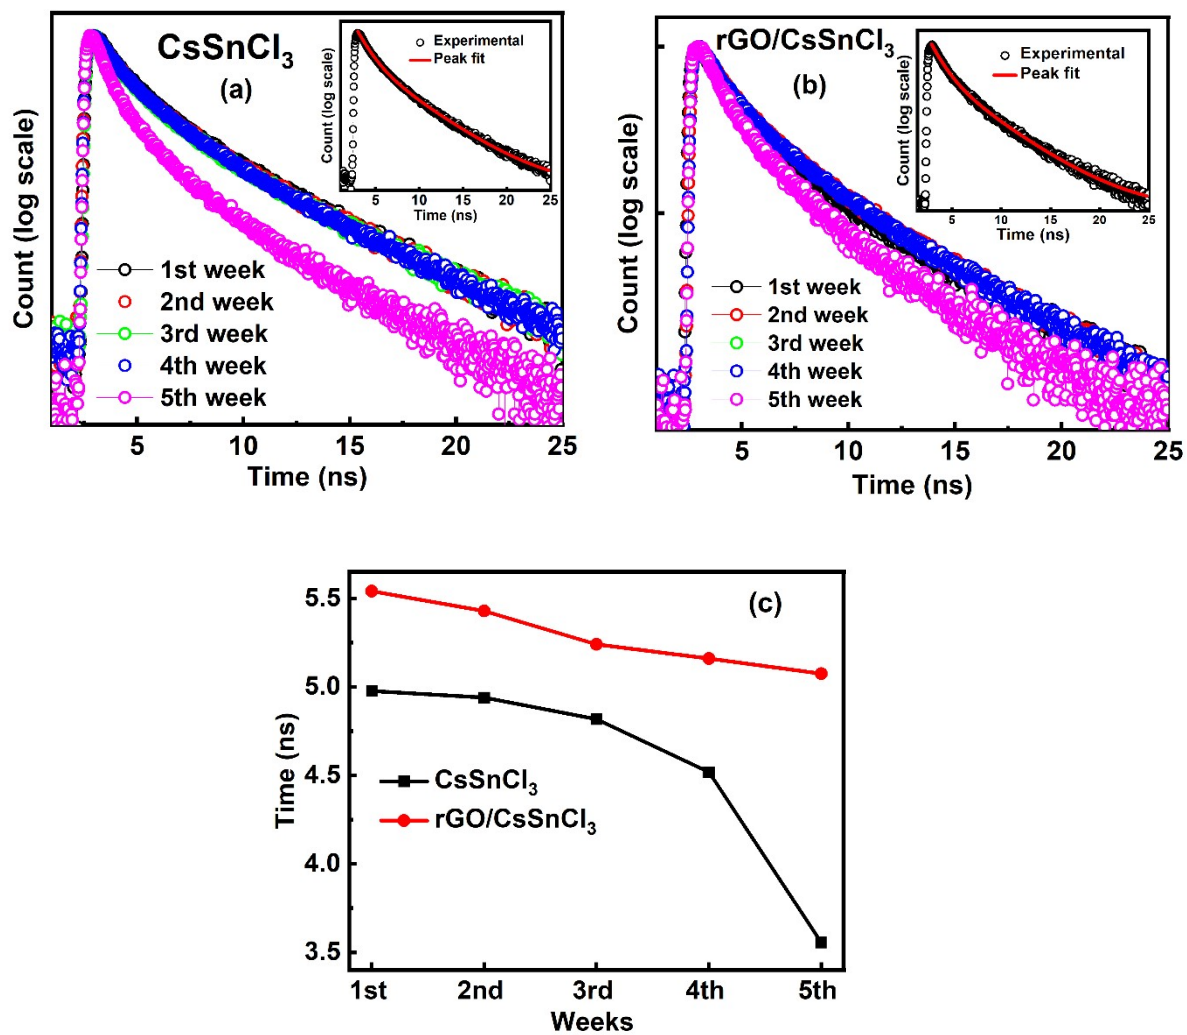

Fig. S1 (a-b) The fluorescence decay of pure  $\text{CsSnCl}_3$  and  $\text{rGO}$  nanocomposite, respectively; (c) Variation of fluorescence lifetime decay of  $\text{CsSnCl}_3$  and  $\text{rGO}$  nanocomposite with the no. per week.

Table S1: Shown the calculated decay lifetime fitted by the double exponential model

| Samples               | Lifetimes       |         |         |
|-----------------------|-----------------|---------|---------|
|                       | weeks           | T1 (ns) | T2 (ns) |
| $\text{CsSnCl}_3$     | 1 <sup>st</sup> | 1.4106  | 4.9764  |
|                       | 2 <sup>nd</sup> | 1.3950  | 4.9395  |
|                       | 3 <sup>rd</sup> | 1.3131  | 4.8178  |
|                       | 4 <sup>th</sup> | 1.3107  | 4.5182  |
|                       | 5 <sup>th</sup> | 0.8472  | 3.5557  |
| $\text{rGO/CsSnCl}_3$ | 1 <sup>st</sup> | 1.5139  | 5.5413  |
|                       | 2 <sup>nd</sup> | 1.5433  | 5.4291  |
|                       | 3 <sup>rd</sup> | 1.4344  | 5.2408  |
|                       | 4 <sup>th</sup> | 1.3957  | 5.1606  |
|                       | 5 <sup>th</sup> | 1.3617  | 5.0754  |

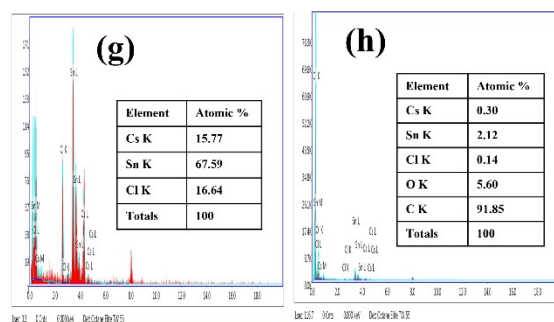

Fig. S2 Shows the Energy Dispersive Spectroscopy (EDS) spectrum for both the material
